# Supplementary material for: Autistic traits are associated with the functional connectivity of between—but not within—attention systems in the general population
Source: Research Square preprint supplement (doi:10.21203/rs.3.rs-61510/v3), 2020-11-05
Supplement: Supplementary file 1 [file 9c485d81f7bf847dcfecf3a7.docx]

**Supplementary Table 1**. The two ROIs that exhibited significant relationships between AQ scores and FC values.
